# Supplementary material
Source: publisher site journal article supplement (https://www.spandidos-publications.com/1756/downloadSupplementary)

Figure S1. Flow diagram of the allocation and treatment of rats. PO, potassium oxonate; AP, allopurinol; LC, lifeceramics; SCC, sodium carboxymethyl cellulose.

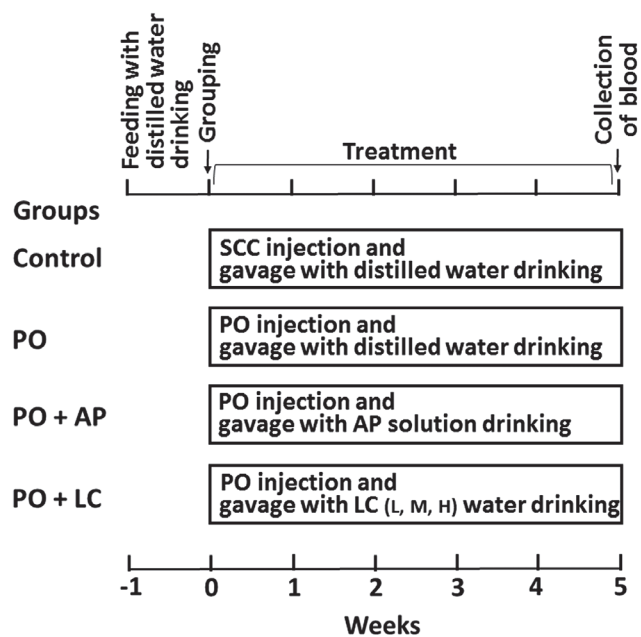

Supplement: Supplementary file 1 [file downloadSupplementary]
